# Supplementary material for: Microfossil assemblages and geochemistry for interpreting the incidence of the Jenkyns Event (early Toarcian) in the south-eastern Iberian Palaeomargin (External Subbetic, SE Spain)
Source: Copernicus journal article supplement (doi:10.5194/jm-39-233-2020), 2020-12-04
Supplement: Supplementary file 1 [file jm-39-233-2020-supplement.zip]

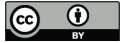

## *Supplement of*

# **Microfossil assemblages and geochemistry for interpreting the incidence of the Jenkyns Event (early Toarcian) in the south-eastern Iberian Palaeomargin (External Subbetic, SE Spain)**

**Matías Reolid**

*Correspondence to:* Matías Reolid ([mreolid@ujaen.es](mailto:mreolid@ujaen.es))

- [jm-39-233-2020-supplement-title-page.pdf](#)
- [Supplementary material.xlsx](#)

The copyright of individual parts of the supplement might differ from the CC BY 4.0 License.
