# Supplementary material for: Microfossil assemblages and geochemistry for interpreting the incidence of the Jenkyns Event (early Toarcian) in the south-eastern Iberian Palaeomargin (External Subbetic, SE Spain)
Source: Copernicus journal article supplement (doi:10.5194/jm-39-233-2020), 2020-12-04
Supplement: Supplementary file 1 [file Supplementary material.xlsx]

## Sheet: Geochemical data
Level	CaCo3 wt.%	Mo/Al*10-4	d13C ‰VPDB	d18O ‰VPDB	TOC (wt.%)	TS (wt.%)
CA-1	95.91	0.001	1.83	-2.98	0.09	0.01
CA-2	37.42	0.027	-0.4	-3.92	0.08	0.01
CA-3	20.09	0.022	-1.70	-3.54	0.08	0.02
CA-4	37.16	0.069	-0.98	-3.53	0.09	0.02
CA-5	52.41	0.036	-0.79	-3.84	0.08	0.01
CA-6	51.43	0.016	-1.87	-4.37	0.07	0.01
CA-7	35.57	0.072	-0.86	-3.96	0-10	0.03
CA-8	42.98	0.001	-1.09	-3.53	0.07	0.02
CA-9	42.23	0.021	-0.56	-4.14	0.22	0.02
CA-10	41.38	0.030	-0.30	-3.82	0.30	0.20
CA-11	37.29	0.028	-0.21	-4.09	0.30	0.08
CA-12	39.73	0.001	-0.15	-4.95	0.33	0.32
CA-13	52.46	0.180	0.10	-5.36	0.53	0.20
CA-13a	56.71	0.0967	0.00	-4.47	0.07	0.14
CA-13b	55.00	0.089	0.14	-3.95	0.04	0.20
CA-13c	53.93	0.087	0.10	-4.17	0.09	0.20
CA-13d	52.45	0.081	0.09	-4.20	0.06	0.16
CA-14	77.59	0.001	0.63	-3.14	0.11	0.01
Geochemical data of the Cueva del Agua section

## Sheet: Microfossil data
Percentage of foraminiferal genera
Level	Ammobaculites	Ammodiscus	Astacolus	Bolivina	Citharina	Dentalina	Encrusters	Eoguttulina	Glomospira	Ichtyolaria	Involutina	Lagena	Lenticulina	Marginulina	Marginulinopsis	Nodosaria	Ophthalmidium	Paralingulina	Planularia	Pseudonodosaria	Reinholdella	Reophax	Spirillina	Textularia	Tristix	Trochammina	Vaginulina
CA-3	0	0	3.06	0	0	4.07	0	18.39	0	0	0	0	4.05	0	3.06	3.06	0	33.72	0	21.45	6.04	0	0	0	0	3.06	0
CA-4	0	0	0	0	0	10.49	0	5.24	0	0	0	0	0	0	0	5.25	5.25	52.48	0	0	0	15.74	5.52	0	0	0	0
CA-5	0	0	0	0	0	22.22	0	22.22	0	11.11	0	0	11.11	22.22	0	0	0	11.11	0	0	0	0	0	0	0	0	0
CA-6	0	0	0	0	0	16.66	0	0	0	0	0	0	0	0	0	33.33	0	50.00	0	0	0	0	0	0	0	0	0
CA-7	0	0	0	0	0	13.33	0	6.66	0	0	0	0	13.33	0	0	30	3.33	20.00	0	10.00	0	0	0	3.33	0	0	0
CA-8	0	0	1.92	0	0	22.12	0	0.96	0	0	0	0	28.82	0	3.84	17.33	0	0.96	0	13.45	0	0	1.92	8.64	0	0	0
CA-9	0	0	4.29	0	0	10.54	0	2.34	0	0	0	0	17.57	0	9.38	14.45	0	0	0.39	8.98	10.54	0	3.13	17.97	0	0	0.39
CA-10	0	0	3.43	0	0	33.03	0	0	0	0	0	0	8.58	0	9.00	18.87	0	0	0	10.34	6.43	0	0.43	9.86	0	0	0
CA-11	0	0	5.30	0	0	7.57	0	0.75	0	0	0	0	18.94	0.57	9.84	4.54	0	3.03	0	4.54	6.06	0	0	38.64	0	0	0
CA-12	0	0	0	0	0	0	0	0	0	0	0	0	0	0	0	0	0	0	0	0	0	0	0	0	0	0	0
CA-13	1.14	0.29	0	19.46	0	19.18	0.57	21.18	1.14	0	0	0	4.37	1.71	0	2.87	8.59	3.43	0	0	12.02	0	4.01	0	0	0	0
CA-13a	5.63	0	0.54	2.95	0	21.75	0	20.85	0.17	0	0.26	0	37.75	0.70	0	0.87	0	0.53	0	0.81	4.02	0	2.14	0.17	0.80	0	0
CA-13b	0	0	0	0	0	58.82	0	29.41	0	0	0	0	5.88	5.88	0	0	0	0	0	0	0	0	0	0	0	0	0
CA-13c	4.00	0	0	0	0	45.33	0	20	0	0	2.66	0	2.66	10.66	1.33	1.33	0	2.66	0	8.00	1.33	0	0	0	0	0	0
CA-13d	2.31	0	0.62	0	0	28.04	0.15	10.64	0	0.15	2.92	0	27.81	3.23	0	3.08	0.31	3.38	0.19	1.39	11.24	1.07	0.97	1.07	0.46	0.92	0
CA-14	6.38	0	0	2.13	0	14.89	0	14.89	0	2.13	0	0	4.25	2.12	0	12.77	0	0	0	4.25	0	8.51	10.64	0	8.51	8.51	0
CA-15	8.39	0	0	0	2.80	11.18	0	11.19	0	0	0	5.59	8.39	0	1.05	0	2.79	2.79	0	0	16.78	2.79	5.59	8.39	2.79	0	0
CA-16	2.90	0	1.05	0.12	0	21.74	0	23.23	0	1.06	0.38	0.53	13.97	0	1.19	0.53	0.66	0.53	0.66	9.42	8.21	1.06	8.07	0	1.98	2.65	0
CA-17	0	0.15	1.76	0	0	51.61	0	7.05	1.76	0.15	0	1.76	9.57	1.76	0.14	8.82	0.15	0	0	10.73	2.06	0	0.59	0	1.91	0	0
Diversity of foraminifera				Abundance (specimens/100 g of dried sample)
Level	α-diversity			Level	Ostracoda	Foraminifera	Radiolarians	Gastropods
CA-03	3.64			CA-03	72.72	362.32	1843002.00	1.21
CA-04	2.91			CA-04	408.33	1111.4	1865550.00	0
CA-05	3.00			CA-05	0	830.36	104718.68	0
CA-06	2.38			CA-06	207.05	112.93	35857.66	0
CA-07	3.57			CA-07	336.21	170.95	0	0
CA-08	2.69			CA-08	4797.58	7526.0	0	0
CA-09	2.61			CA-09	1594.17	0	0	7.81
CA-10	1.86			CA-10	832.45	666.02	0	0.93
CA-11	2.85			CA-11	65.76	178.55	4995.36	1.66
CA-12	0.00			CA-12	0	0	0	0
CA-13	3.6			CA-13	60.19	403.34	0	0
CA-13a	3.77			CA-13a	94.19	573.42	0	3.86
CA-13b	1.64			CA-13b	69.37	393.08	46.24	0
CA-13c	3.55			CA-13c	140.83	480.11	6.40	0
CA-13d	4.14			CA-13d	77.25	738.35	5.68	0
CA-14	5.2			CA-14	306.76	1472.9	8.01	0
CA-15	9.18			CA-15	120.28	1153.8	0	0
CA-16	5.64			CA-16	427.46	1768.5	35.30	0
CA-17	5.56			CA-17	261.47	429.51	48.20	0
Percentage of ostracod genera
	Bairdiidae				Healdiidae		Pontocyprididae	Cytherellidae	Cyprididae	Bythocytheridae	Polycopidae
Sigla	Bairdia	Bairdiacypris	Isobythocypris	Ptychobairdia	Ogmoconcha	Ogmoconchella	Pontocyprella	Cytherella	Liasina	Patellacythere	Polycope
CA-03	0	0	0	44.77	0	0	0	55.23	0	0	0
CA-04	3.4	0	0	42.00	0	0	0	54.60	0	0	0
CA-05	2.0	0	0	43.70	0	0	0	54.30	0	0	0
CA-06	0	0	0	44.80	0	0	0	55.20	0	0	0
CA-07	0	0	0	34.00	0	0	0	66.00	0	0	0
CA-08	1.0	0	0	25.00	0	0	0	74.00	0	0	0
CA-09	1.0	0	1.25	0.85	0	0	0	86.56	9.72	0	0
CA-10	0.5	0	1.5	0	0	0	0	68.00	30.00	0	0
CA-11	0	0	0	0	0	0	0	100	0	0	0
CA-12	0	0	0	0	0	0	0	0	0	0	0
CA-13	0	0	0	0	0	28.57	0	71.43	0	0	0
CA-13a	0	0	6.66	6.66	6.66	0	0	60.00	6.66	0	13.33
CA-13b	4.52	0	6.03	7.55	3.50	1.30	0	66.42	6.50	2.70	1.02
CA-13c	6.95	0	2.25	8.15	1.00	0	0	72.34	5.55	3.56	0
CA-13d	8.32	0	0	8.33	0	0	0	75.00	4.16	4.16	0
CA-14	3.52	0	6.35	0	18.03	16.98	6.75	3.52	44.83	0	0
CA-15	4.45	0	6.01	0	15.03	19.82	5.1	2.57	47.02	0	0
CA-16	3.44	0	6.89	0	17.24	17.24	6.89	3.44	44.82	0	0
CA-17	14.28	14.28	28.57	0	14.29	14.29	0	0	14.29	0	0
Data of Foraminifera and Ostracoda of the Cueva del Agua section
