# Supplementary material for: Microfossil assemblages and geochemistry for interpreting the incidence of the Jenkyns Event (early Toarcian) in the south-eastern Iberian Palaeomargin (External Subbetic, SE Spain)
Source: Copernicus journal article supplement (doi:10.5194/jm-39-233-2020), 2020-12-04
Supplement: Supplementary file 2 [file jm-39-233-2020-supplement.zip]

Archive with 2 entries (2 files):
- Supplementary material.xlsx
- jm-39-233-2020-supplement-title-page.pdf
